# Supplementary material
Source: PubMed Central journal article supplement (PMC3603337)
Supplement: supp_216.7.1160_JEB075598.pdf [file supp_216.7.1160_JEB075598.pdf]

Table S1. Altitudinal variation in uncorrected  $\dot{V}_{O_{2,max}}$  across the three treatments

| Population | Treatment            | $\dot{V}_{O_{2,max}}$ (ml min <sup>-1</sup> ) |
|------------|----------------------|-----------------------------------------------|
| HA         | <i>In situ</i>       | 2.44±0.19 <sup>a</sup>                        |
|            | 6 week deacclimation | 2.06±0.15 <sup>a</sup>                        |
|            | F <sub>1</sub>       | 1.30±0.12 <sup>b</sup>                        |
| LA         | <i>In situ</i>       | 1.27±0.14 <sup>b</sup>                        |
|            | 6 week deacclimation | 1.08±0.07 <sup>b</sup>                        |
|            | F <sub>1</sub>       | 0.86±0.12 <sup>b</sup>                        |

$\dot{V}_{O_{2,max}}$  is given as mean ± s.e.m.

HA, high-altitude; LA, low-altitude.

Superscript letters denote population and treatment combinations that are significantly different from one another (two-way ANOVA followed by *post hoc* Tukey HSD tests).
